# Supplementary figures and images for: Safety and Efficacy of Sedation During Emergency Endoscopy for Upper Gastrointestinal Bleeding: A Propensity Score Matching Analysis
Source: PubMed Central journal article supplement — Dig Dis Sci. 2022 Oct 22;68(4):1426–34. doi: 10.1007/s10620-022-07740-0 (PMC10102050; doi:10.1007/s10620-022-07740-0), 2022-10-22

**Supplementary Figure 1.**

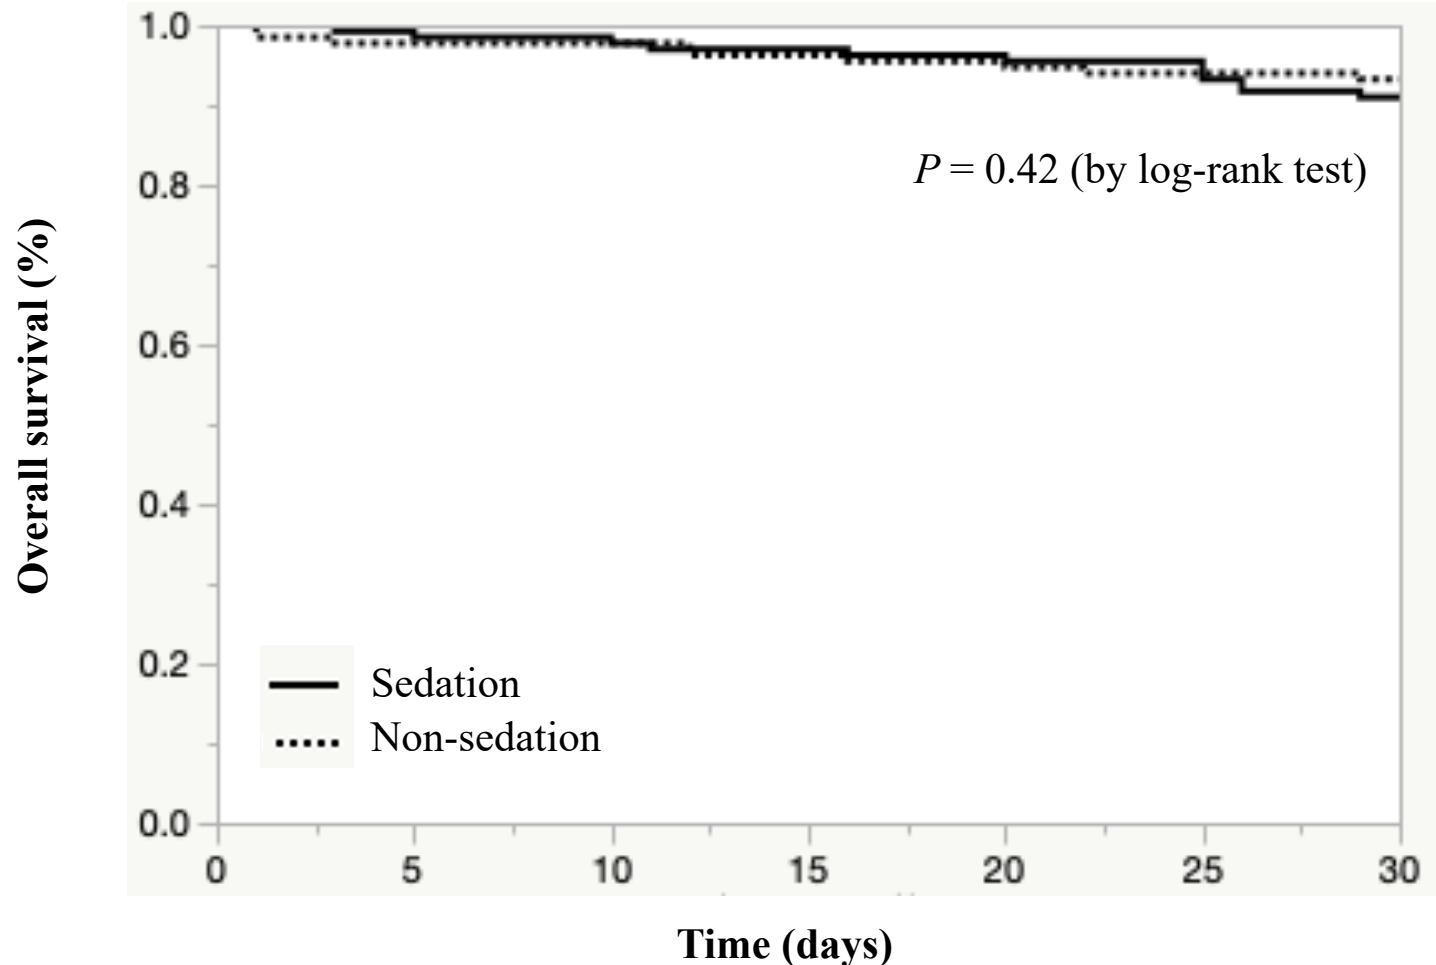

Numbers at risk

|              |     |     |     |     |
|--------------|-----|-----|-----|-----|
| Sedation     | 133 | 131 | 128 | 121 |
| Non-sedation | 133 | 131 | 127 | 124 |

Supplement: 10620_2022_7740_MOESM3_ESM.pdf [file 10620_2022_7740_MOESM3_ESM.pdf]
